# Supplementary material for: Toward once-monthly insulin therapy via synergy in two pharmacokinetic protractors: Fc-conjugation and fatty acid acylation
Source: Royal Society of Chemistry journal article supplement (doi:10.1039/d4cb00078a), 2024-01-01
Supplement: d4cb00078a1.pdf [file d4cb00078a1.pdf]

## Supporting Information

# Toward once-monthly insulin therapy via synergy in two pharmacokinetic protractors: Fc-conjugation and fatty acid acylation.

Alexander N. Zaykov,<sup>a</sup> Vasily M. Gelfanov,<sup>a</sup> Tina M. Tagmose,<sup>b</sup> Damien Demozey,<sup>b</sup> Valentina Manfè,<sup>b</sup> Rebecca Rohlfes,<sup>a</sup> Marita Rivir,<sup>c</sup> Diego Perez-Tilve,<sup>c</sup> Brian Finan,<sup>a</sup> and Richard D. DiMarchi<sup>a,d</sup>

<sup>a</sup> Novo Nordisk Research Center Indianapolis, Indianapolis, IN, 46241, USA

<sup>b</sup> Novo Nordisk, Global Research Technologies, DK-2760 Maaloev, Denmark

<sup>c</sup> Department of Pharmacology and Systems Physiology, University of Cincinnati-College of Medicine, Cincinnati, OH, 45267, USA

<sup>d</sup> Department of Chemistry, Indiana University, Bloomington, IN, 47405, USA

† Corresponding Author: Alexander N. Zaykov – Novo Nordisk Research Center Indianapolis, Indianapolis, IN, 46241, USA. E-mail:

[alexander.n.zaykov@gmail.com](mailto:alexander.n.zaykov@gmail.com)

### Table of content

|                                                                                                                              |        |
|------------------------------------------------------------------------------------------------------------------------------|--------|
| Figure S1. Human albumin and Fc in complex with FcRn receptor (PDB 4N0U).                                                    | S2     |
| Figure S2. Pharmacokinetic profiles compounds Fc/FA-Ins1, Fc-Ins1, Fc/FA-Ins1(B1) and FA-Ins1 from s.c. PK study in rats.    | S2     |
| Table S1. PK parameters for compounds Fc/FA-Ins1, Fc-Ins1, Fc/FA-Ins1(B1) and FA-Ins1 from s.c. PK study in rats.            | S2     |
| Figure S3. Pharmacokinetic profiles of compounds Fc-Ins9, Fc/FA-Ins6, Fc/FA-Ins7, and Fc/FA-Ins9 from i.v. PK study in rats. | S3     |
| Table S2. PK parameters of compounds Fc-Ins9, Fc/FA-Ins6, Fc/FA-Ins7, and Fc/FA-Ins9 from i.v. PK study in rats.             | S3     |
| Figure S4. Pharmacokinetic profiles from individual animals in dog PK study, Fc/FA-Ins1                                      | S4     |
| Figure S5. Pharmacokinetic profiles from individual animals in dog PK study, Fc-Ins1                                         | S4     |
| Figure S6. Pharmacokinetic profiles from individual animals in dog PK study, Fc/FA-Ins9                                      | S4     |
| Figure S7. Pharmacokinetic profiles from individual animals in dog PK study, Fc-Ins9                                         | S4     |
| Table S3. Pharmacokinetic parameters from individual animals in dog PK study                                                 | S5     |
| Figure S8. Representative dose-response curves from in-vitro insulin receptor activity assays.                               | S6-S7  |
| Figure S9. A generalized synthetic scheme for preparation of Fc/FA-Ins1.                                                     | S8     |
| Table S4. MS characterization summary of the insulin compounds prepared in this study.                                       | S9     |
| Structures and LCMS data of the insulin compounds prepared in this study.                                                    | S9-S25 |

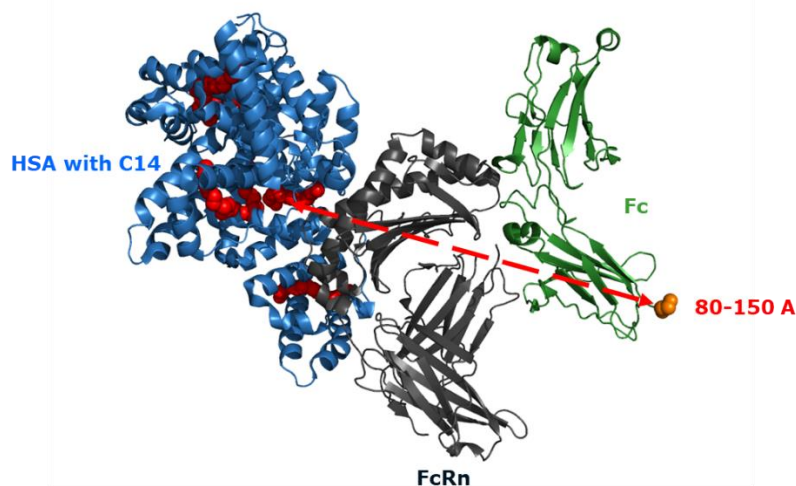

**Figure S1.** Human albumin and Fc in complex with FcRn receptor (PDB 4N0U). The distance from fatty acids binding sites to the N-terminus of Fc protein varies from 80 to 150Å. We hypothesized that a spacer with 10 Ado (OEG) units, which approximately 110Å in length, will allow simultaneous binding of albumin and Fc, and formation of quasi-quaternary complex.

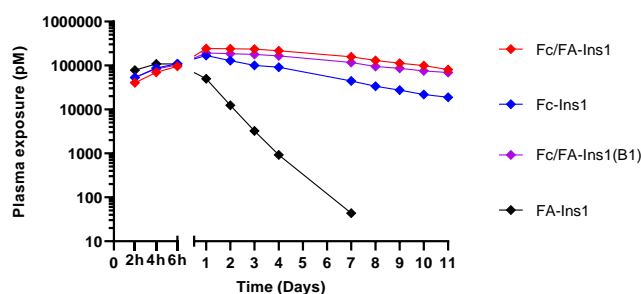

**Figure S2.** Pharmacokinetic profiles compounds Fc/FA-Ins1, Fc-Ins1, Fc/FA-Ins1(B1) and FA-Ins1 from s.c. PK study in rats.

| Compound       | Stat | Dose (nmol) | # of animals | HL_Lambda_z (hr) | Cmax (pmol/L) | AUCINF_pred (hr*pmol/L) | AUC_%Extrap_pred (%) | Vz_pred (L/kg) | Cl_pred (L/hr/kg) |
|----------------|------|-------------|--------------|------------------|---------------|-------------------------|----------------------|----------------|-------------------|
| Fc-Ins1        | Mean | 30          | 5            | 124              | 2.52E+05      | 6.09E+07                | 26                   | 0.087          | 4.97E-04          |
|                | SD   |             |              | 29               | 1.48E+04      | 6.14E+06                | 7                    | 0.013          | 5.26E-05          |
| Fc/FA-Ins1     | Mean | 30          | 5            | 76               | 1.69E+05      | 2.12E+07                | 9                    | 0.155          | 1.42E-03          |
|                | SD   |             |              | 6                | 1.68E+04      | 1.28E+06                | 2                    | 0.009          | 9.10E-05          |
| FA-Ins1        | Mean | 30          | 5            | 135              | 1.98E+05      | 4.79E+07                | 28                   | 0.122          | 6.29E-04          |
|                | SD   |             |              | 16               | 1.39E+04      | 3.87E+06                | 4                    | 0.007          | 5.07E-05          |
| Fc/FA-Ins1(B1) | Mean | 30          | 5            | 13               | 1.11E+05      | 2.92E+06                | 0.3                  | 0.188          | 1.03E-02          |
|                | SD   |             |              | 1                | 1.26E+04      | 1.51E+05                | 0.2                  | 0.021          | 5.58E-04          |

**Table S1.** PK parameters for compounds Fc/FA-Ins1, Fc-Ins1, Fc/FA-Ins1(B1) and FA-Ins1 from s.c. PK study in rats.

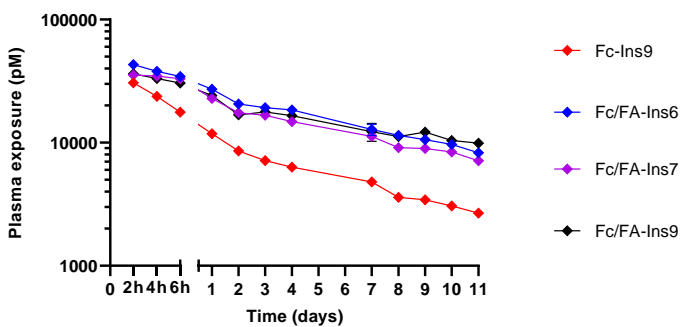

**Figure S3.** Pharmacokinetic profiles of compounds Fc-Ins9, Fc/FA-Ins6, Fc/FA-Ins7, and Fc/FA-Ins9 from i.v. PK study in rats.

| Compound   | Stat | Dose (nmol/kg) | # of animals | HL_Lambda_z (hr) | Cmax (pmol/L) | AUCINF_pred (hr*pmol/L) | AUC_%Extrap_pred (%) | Vz_pred (L/kg) | CL_pred (L/hr/kg) |
|------------|------|----------------|--------------|------------------|---------------|-------------------------|----------------------|----------------|-------------------|
| Fc-Ins9    | Mean | 2              | 5            | 132              | 30620         | 2.26E+06                | 23                   | 0.169          | 8.88E-04          |
|            | SD   |                |              | 4                | 2520          | 1.64E+05                | 2                    | 0.011          | 6.16E-05          |
| Fc/FA-Ins9 | Mean | 2              | 5            | 239              | 36460         | 7.58E+06                | 44                   | 0.09           | 2.65E-04          |
|            | SD   |                |              | 64               | 2971          | 6.16E+05                | 7                    | 0.016          | 3.07E-05          |
| Fc/FA-Ins6 | Mean | 2              | 5            | 153              | 43300         | 6.29E+06                | 29                   | 0.071          | 3.21E-04          |
|            | SD   |                |              | 8                | 1900          | 6.36E+05                | 2                    | 0.008          | 2.33E-05          |
| Fc/FA-Ins7 | Mean | 2              | 5            | 164              | 30620         | 5.39E+06                | 32                   | 0.088          | 3.72E-04          |
|            | SD   |                |              | 19               | 2520          | 3.64E+05                | 5                    | 0.012          | 2.01E-05          |

**Table S2.** PK parameters of compounds Fc-Ins9, Fc/FA-Ins6, Fc/FA-Ins7, and Fc/FA-Ins9 from i.v. PK study in rats.

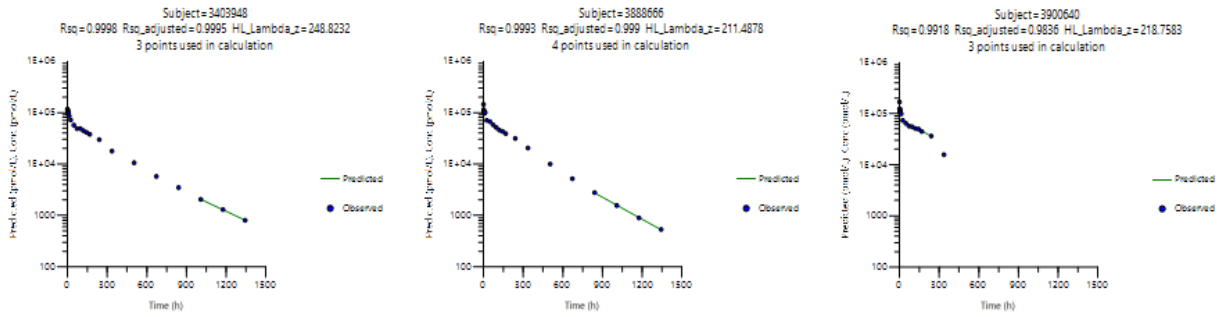

**Figure S4.** Pharmacokinetic profiles from individual animals in dog PK study, Fc/FA-Ins1

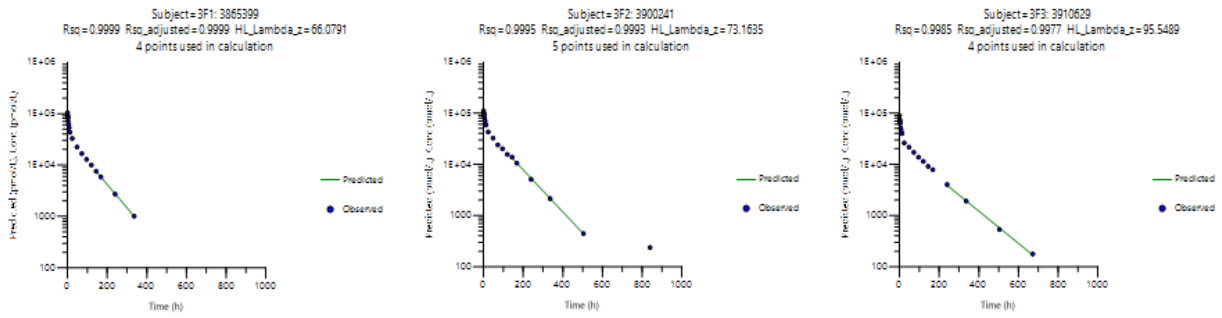

**Figure S5.** Pharmacokinetic profiles from individual animals in dog PK study, Fc-Ins1

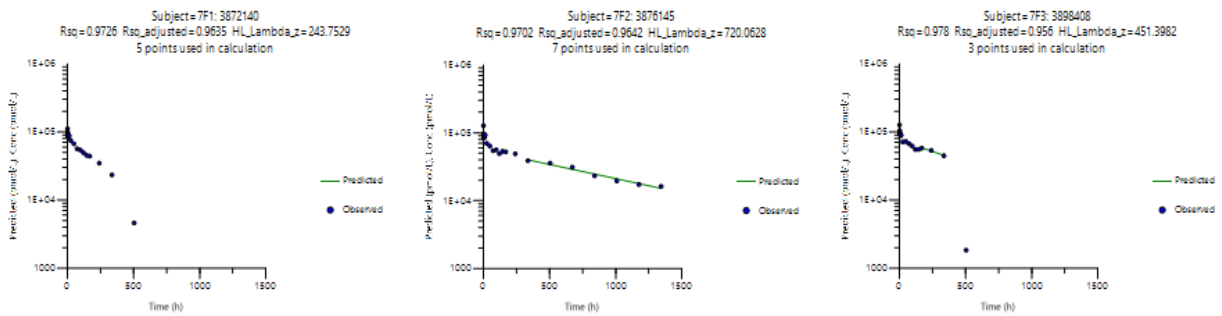

**Figure S6.** Pharmacokinetic profiles from individual animals in dog PK study, Fc/FA-Ins9

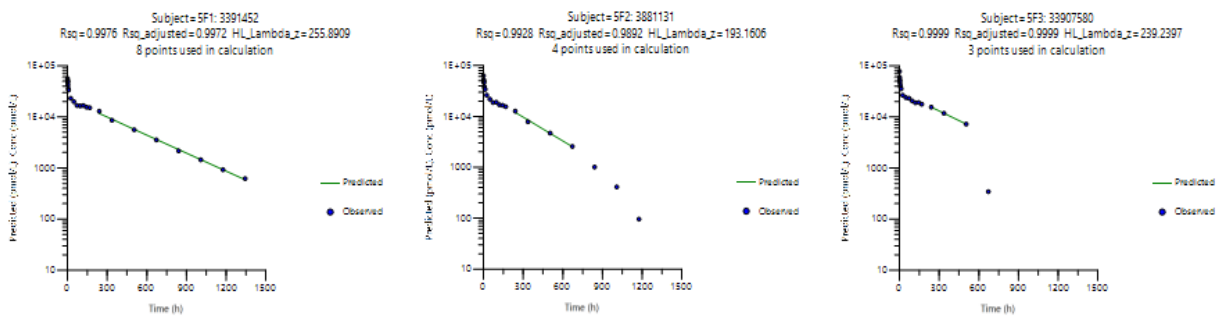

**Figure S7.** Pharmacokinetic profiles from individual animals in dog PK study, Fc-Ins9

**Table S3.** Pharmacokinetic parameters from individual animals in dog PK study

| Analyte    | Subject        | Dose (pmol) | Rsq      | No_points_lambda_z | HL_Lambda_z (h) | AUC_%Extrap_pred (%) | Tmax (h) | Cmax (pmol/L) | C0 (pmol/L) | AUCINF_pred (h*pmol/L) | Vz_pred (L/kg) | Cl_Pred (L/h/kg) | Vss_pred (L/kg) |
|------------|----------------|-------------|----------|--------------------|-----------------|----------------------|----------|---------------|-------------|------------------------|----------------|------------------|-----------------|
| Fc/FA-Ins1 | 3400000        | 5000        | 1        | 3                  | 249             | 1.47                 | 1        | 111000        | 117000      | 19700000               | 0.0912         | 0.000254         | 0.0709          |
|            | 3890000        | 5000        | 0.999    | 4                  | 211             | 0.787                | 1        | 114000        | 145000      | 20400000               | 0.0749         | 0.000246         | 0.0612          |
|            | 3900000        | 5000        | 0.992    | 3                  | 219             | 34.7                 | 3        | 123000        | 168000      | 24300000               | 0.065          | 0.000206         | 0.0636          |
|            | Mean           | 5000        | 0.997    | 3.33               | 226             | 12.3                 | 1.67     | 116000        | 143000      | 21400000               | 0.077          | 0.000235         | 0.0652          |
|            | SD             | 0           | 0.00449  | 0.577              | 19.8            | 19.4                 | 1.15     | 6240          | 25400       | 2470000                | 0.0132         | 2.56E-05         | 0.00508         |
|            | CV%            | 0           | 0.45     | 17.3               | 8.74            | 157                  | 69.3     | 5.38          | 17.7        | 11.5                   | 17.1           | 10.9             | 7.79            |
|            | Median         | 5000        | 0.999    | 3                  | 219             | 1.47                 | 1        | 114000        | 145000      | 20400000               | 0.0749         | 0.000246         | 0.0636          |
|            | Geometric Mean | 5000        | 0.997    | 3.3                | 226             | 34.2                 | 1.44     | 116000        | 142000      | 21300000               | 0.0763         | 0.000234         | 0.0651          |
|            | Geometric SD   | 1           | 1        | 1.18               | 1.09            | 7.61                 | 1.89     | 1.05          | 1.2         | 1.12                   | 1.12           | 1.12             | 1.08            |
|            | Geometric CV%  | 0           | 0.451    | 16.7               | 8.59            | 777                  | 70.4     | 5.33          | 18.2        | 11.3                   | 17.1           | 11.3             | 7.68            |
| Fc-Ins1    | 3F1:3865399    | 5000        | 1        | 4                  | 661             | 2.43                 | 1        | 92300         | 104000      | 3950000                | 0.121          | 0.00127          | 0.103           |
|            | 3F2:3900241    | 5000        | 0.999    | 5                  | 73.2            | 0.0324               | 1        | 100000        | 111000      | 5910000                | 0.0892         | 0.000845         | 0.0834          |
|            | 3F3:3910629    | 5000        | 0.998    | 4                  | 95.5            | 0.553                | 1        | 73800         | 89000       | 4210000                | 0.164          | 0.00119          | 0.133           |
|            | Mean           | 5000        | 0.999    | 4.33               | 78.3            | 1                    | 1        | 88700         | 101000      | 4690000                | 0.125          | 0.0011           | 0.106           |
|            | SD             | 0           | 0.000731 | 0.577              | 15.4            | 1.26                 | 0        | 13500         | 11400       | 1070000                | 0.0373         | 0.000224         | 0.0248          |
|            | CV%            | 0           | 0.0732   | 13.3               | 19.7            | 125                  | 0        | 15.2          | 11.2        | 22.7                   | 30             | 20.3             | 23.4            |
|            | Median         | 5000        | 0.999    | 4                  | 73.2            | 0.553                | 1        | 92300         | 104000      | 4210000                | 0.121          | 0.00119          | 0.103           |
|            | Geometric Mean | 5000        | 0.999    | 4.31               | 77.3            | 0.351                | 1        | 88000         | 101000      | 4620000                | 0.121          | 0.00108          | 0.104           |
|            | Geometric SD   | 1           | 1        | 1.14               | 1.21            | 8.97                 | 1        | 1.17          | 1.12        | 1.24                   | 1.35           | 1.24             | 1.26            |
|            | Geometric CV%  | 0           | 0.0732   | 12.9               | 19.2            | 1110                 | 0        | 15.8          | 11.5        | 22                     | 31             | 22               | 23.6            |
| Fc-Ins9    | 5F1:3391452    | 5000        | 0.998    | 8                  | 256             | 2.51                 | 1        | 51900         | 56600       | 8620000                | 0.214          | 0.00058          | 0.203           |
|            | 5F2:3881131    | 5000        | 0.993    | 4                  | 193             | 1.48                 | 1        | 52900         | 63200       | 7830000                | 0.178          | 0.000639         | 0.166           |
|            | 5F3:33907580   | 5000        | 1        | 3                  | 239             | 15                   | 1        | 59800         | 77900       | 10200000               | 0.169          | 0.000488         | 0.163           |
|            | Mean           | 5000        | 0.997    | 5                  | 229             | 6.32                 | 1        | 54900         | 65900       | 8900000                | 0.187          | 0.000569         | 0.177           |
|            | SD             | 0           | 0.00365  | 2.65               | 32.5            | 7.51                 | 0        | 4300          | 10900       | 1230000                | 0.024          | 7.58E-05         | 0.0224          |
|            | CV%            | 0           | 0.366    | 52.9               | 14.2            | 119                  | 0        | 7.84          | 16.5        | 13.8                   | 12.9           | 13.3             | 12.6            |
|            | Median         | 5000        | 0.998    | 4                  | 239             | 2.51                 | 1        | 52900         | 63200       | 8620000                | 0.178          | 0.00058          | 0.166           |
|            | Geometric Mean | 5000        | 0.997    | 4.58               | 228             | 3.82                 | 1        | 54800         | 65300       | 8840000                | 0.186          | 0.000565         | 0.176           |
|            | Geometric SD   | 1           | 1        | 1.66               | 1.16            | 3.36                 | 1        | 1.08          | 1.18        | 1.15                   | 1.13           | 1.15             | 1.13            |
|            | Geometric CV%  | 0           | 0.367    | 53.8               | 14.8            | 183                  | 0        | 7.7           | 16.3        | 13.7                   | 12.6           | 13.7             | 12.3            |
| Fc/FA-Ins9 | 7F1:3872140    | 5000        | 0.973    | 5                  | 244             | 24.6                 | 1        | 99300         | 111000      | 23900000               | 0.0736         | 0.000209         | 0.0698          |
|            | 7F2:3876145    | 5000        | 0.97     | 7                  | 720             | 26.4                 | 1        | 96700         | 127000      | 59700000               | 0.0871         | 8.38E-05         | 0.0838          |
|            | 7F3:3898408    | 5000        | 0.978    | 3                  | 451             | 48.9                 | 1        | 105000        | 127000      | 46500000               | 0.07           | 0.000107         | 0.0707          |
|            | Mean           | 5000        | 0.974    | 5                  | 472             | 33.3                 | 1        | 100000        | 122000      | 43400000               | 0.0769         | 0.000133         | 0.0748          |
|            | SD             | 0           | 0.00398  | 2                  | 239             | 13.5                 | 0        | 4250          | 8870        | 18100000               | 0.00901        | 6.66E-05         | 0.00782         |
|            | CV%            | 0           | 0.409    | 40                 | 50.6            | 40.7                 | 0        | 4.23          | 7.3         | 41.7                   | 11.7           | 49.9             | 10.5            |
|            | Median         | 5000        | 0.973    | 5                  | 451             | 26.4                 | 1        | 99300         | 127000      | 46500000               | 0.0736         | 0.000107         | 0.0707          |
|            | Geometric Mean | 5000        | 0.974    | 4.72               | 429             | 31.7                 | 1        | 100000        | 121000      | 40500000               | 0.0765         | 0.000124         | 0.0745          |
|            | Geometric SD   | 1           | 1        | 1.53               | 1.72            | 1.46                 | 1        | 1.04          | 1.08        | 1.6                    | 1.12           | 1.6              | 1.11            |
|            | Geometric CV%  | 0           | 0.409    | 44.7               | 58.6            | 39.2                 | 0        | 4.21          | 7.48        | 50.1                   | 11.5           | 50.1             | 10.2            |

# In-vitro insulin receptor activity assays

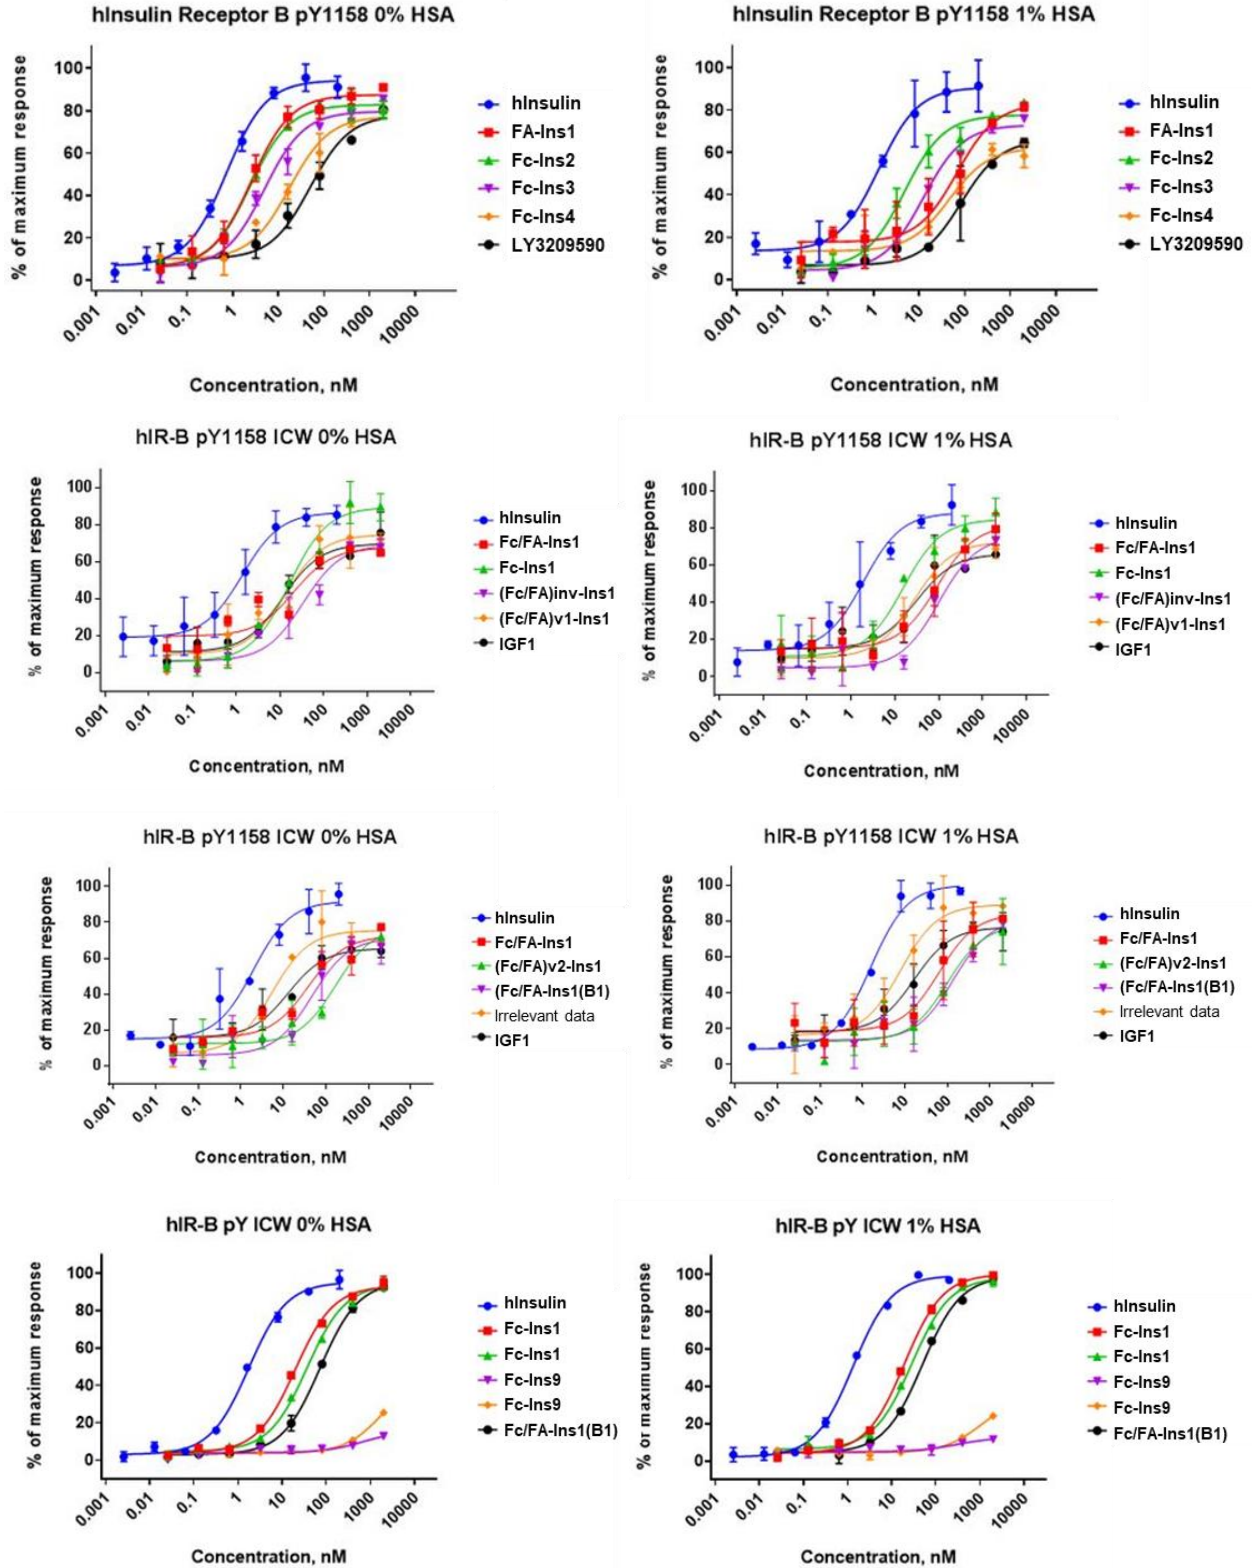

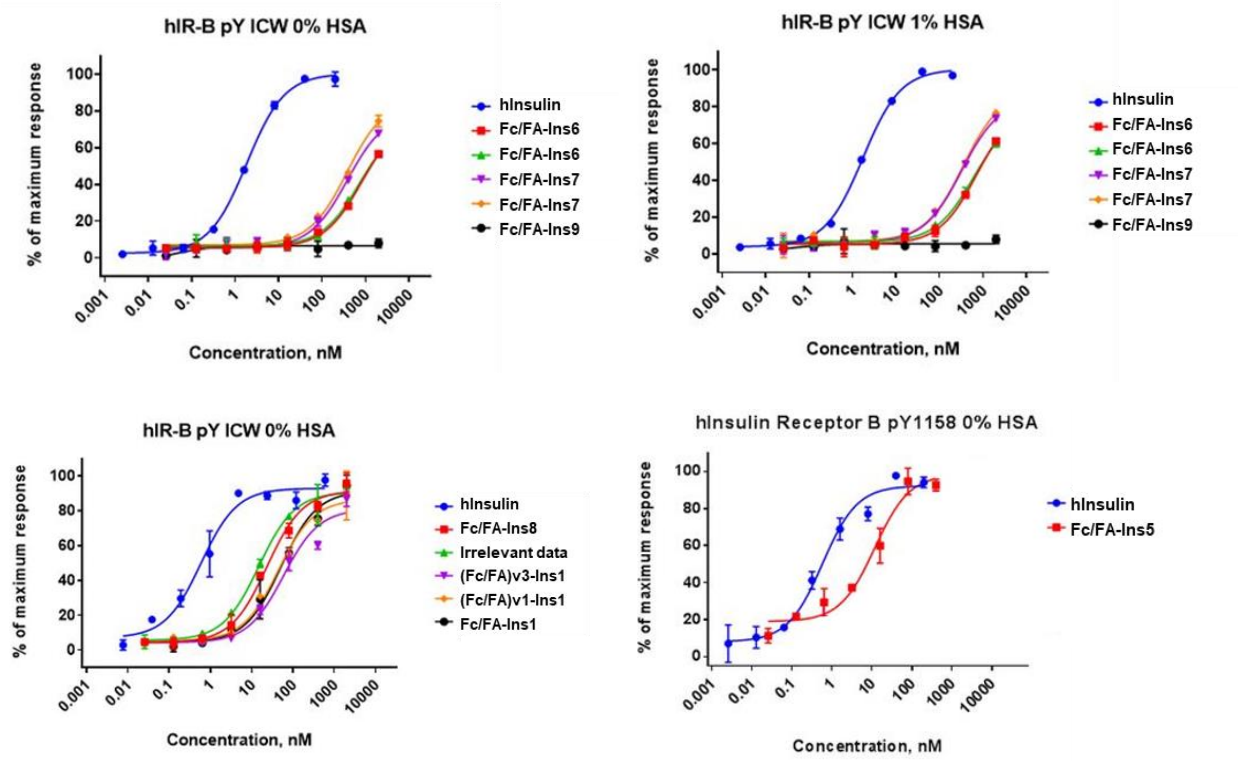

**Figure S8.** Representative dose-response curves from in-vitro insulin receptor activity assays. Insulin receptor phosphorylation was measured in an indirect ELISA assay using HEK293 cells overexpressing B-isoform of human insulin receptor (hIR-B). The EC50 values and potencies relative to native insulin used in the same assay are reported in the Figure 1.

## Representative synthesis

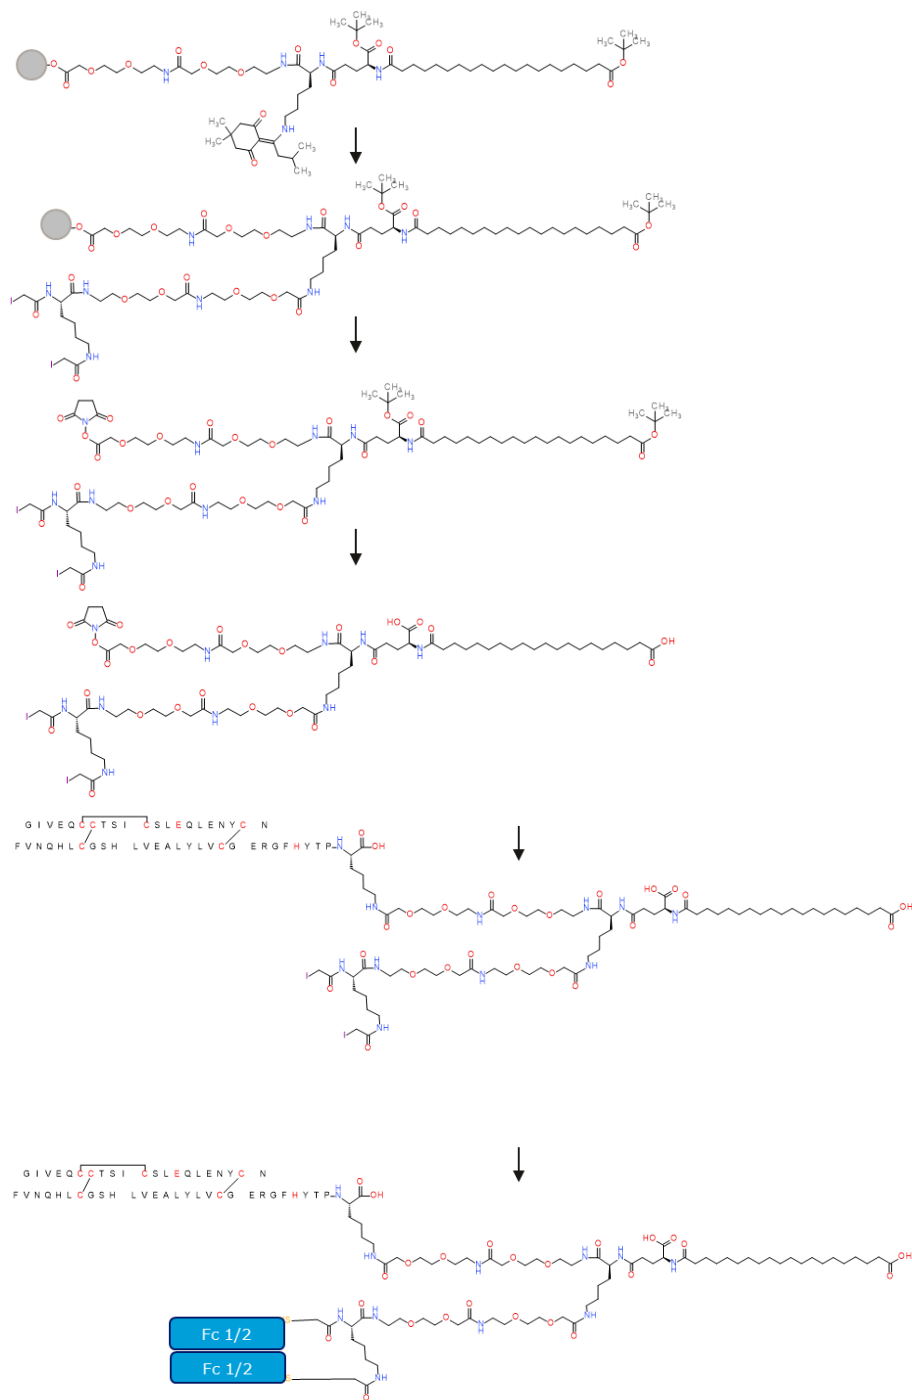

**Figure S9.** A generalized synthetic scheme for preparation of Fc/FA-Ins1.



## Structures and characterizations

**Table S4.** LCMS characterization of the insulin compounds prepared in this study.

| Compound         | Calc mass | Obs. Mass |
|------------------|-----------|-----------|
| Fc/FA-Ins1       | 58807     | 58807     |
| Fc-Ins1          | 56771     | 56774     |
| Fc/FA-Ins1(B1)   | 58807     | 58809     |
| Fc/FA-Ins5       | 58964     | 58962     |
| Fc/FA-Ins6       | 58758     | 58760     |
| Fc/FA-Ins7       | 58782     | 58782     |
| Fc/FA-Ins8       | 58851     | 58851     |
| (Fc/FA)inv-Ins1  | 58801     | 58809     |
| (Fc/FA)v1-Ins1   | 57936     | 57933     |
| (Fc/FA)v2-Ins1   | 57936     | 57939     |
| (Fc/FA)v3-Ins1   | 57645     | 57645     |
| (Fc/FA)half-Ins1 | 34099     | 34101     |
| Fc-Ins9          | 58736     | 58740     |
| Fc-Ins9          | 56701     | 56700     |

### Fc/FA-Ins1

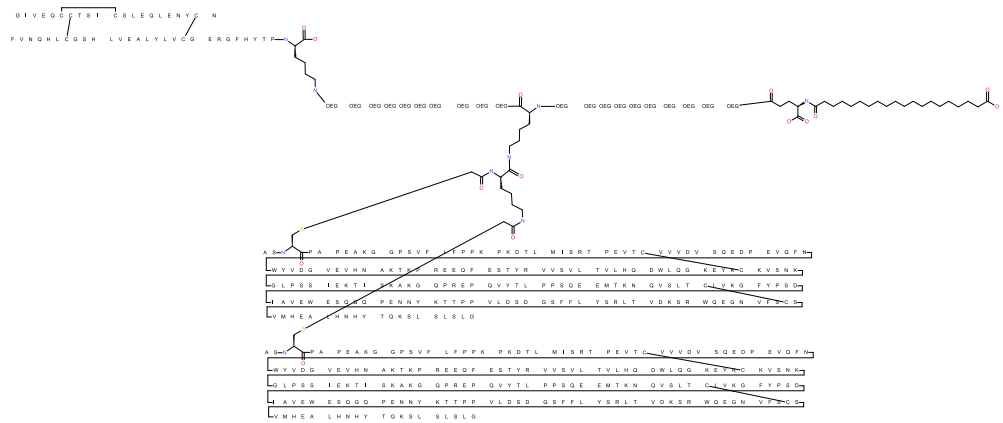

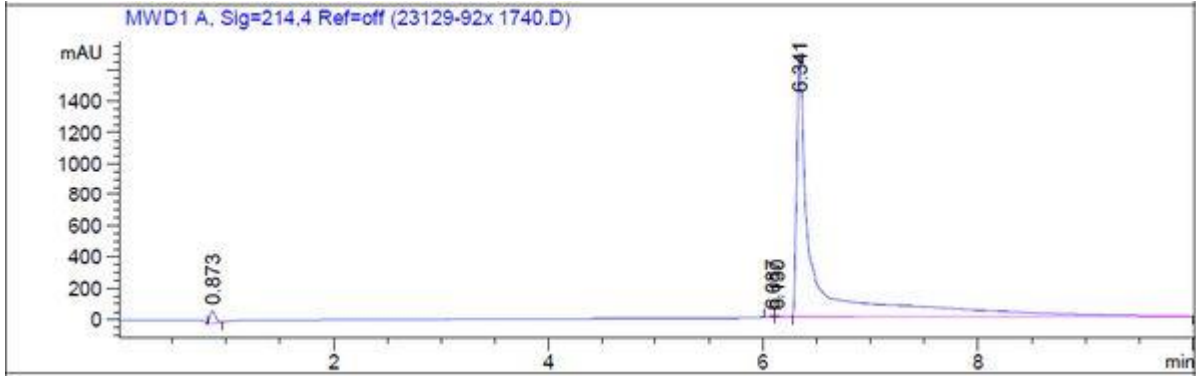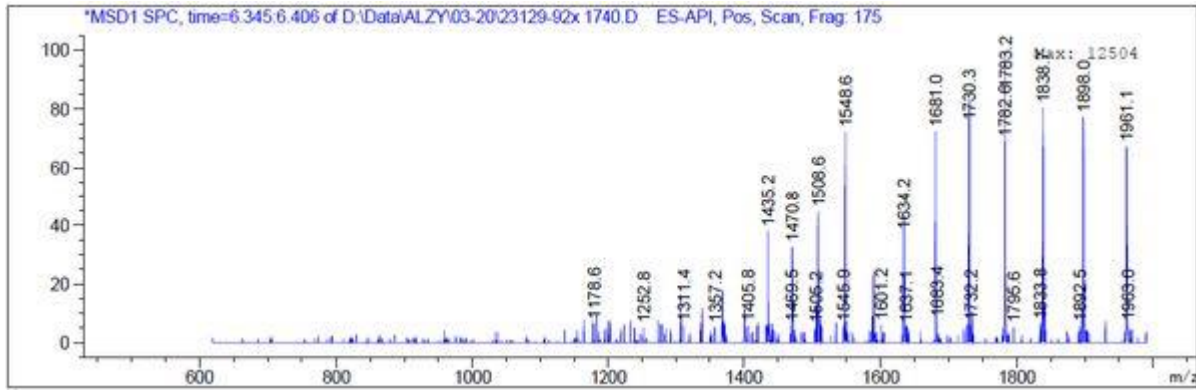

MW exp 58807, obs 58807

Fc-Ins1

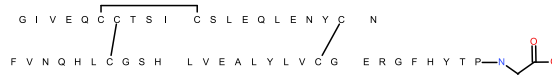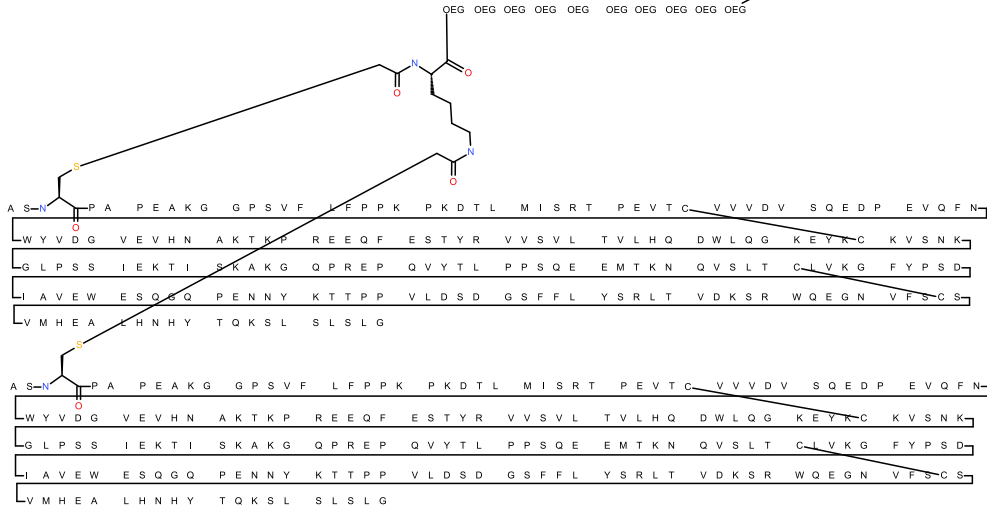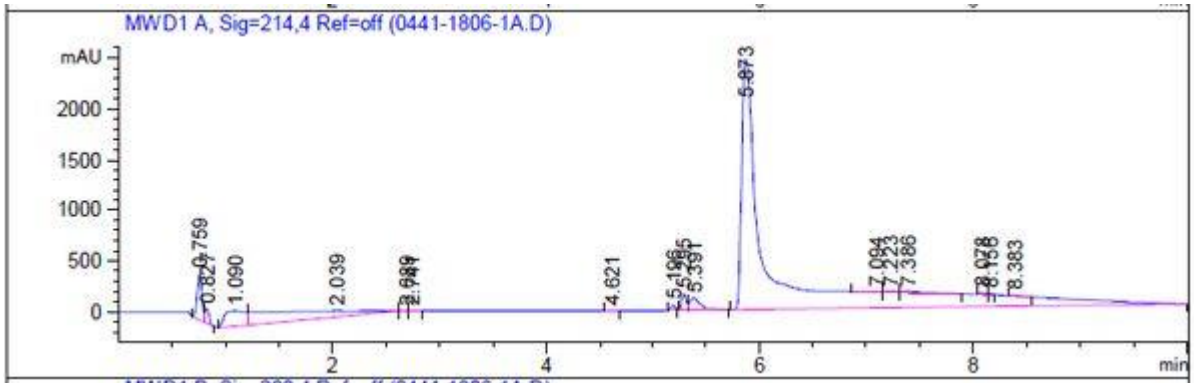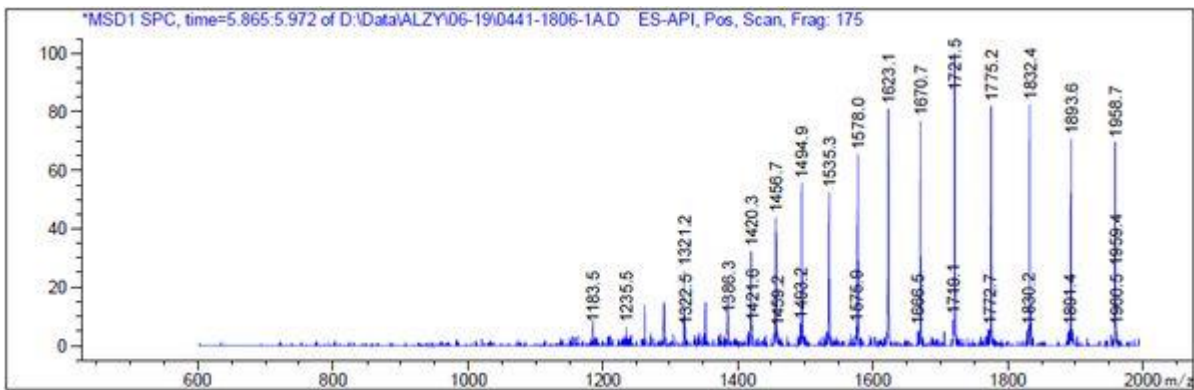

MW exp 56771, obs 55774

Fc/FA-Ins1(B1)

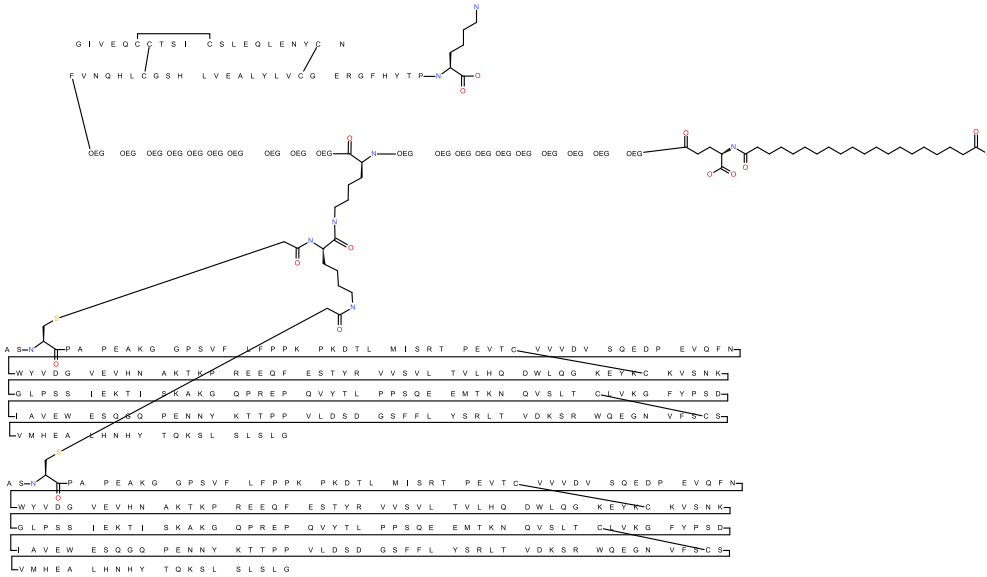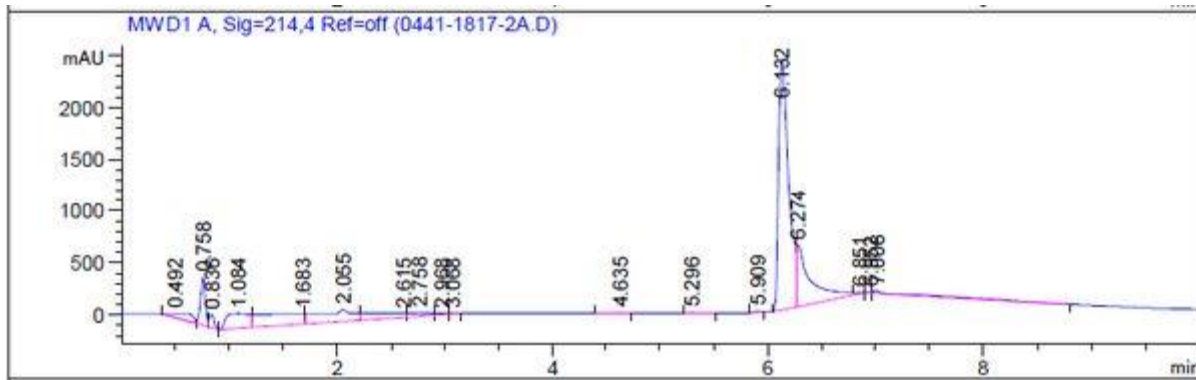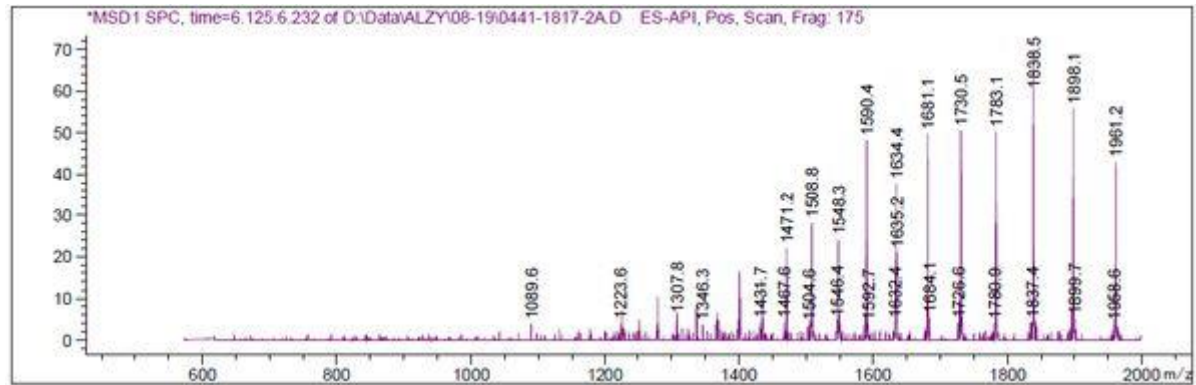

MW exp 58807, obs 58809

Fc/FA-Ins5

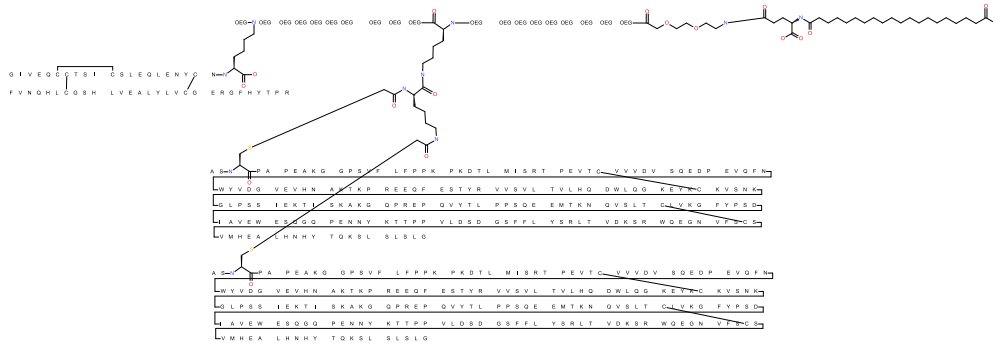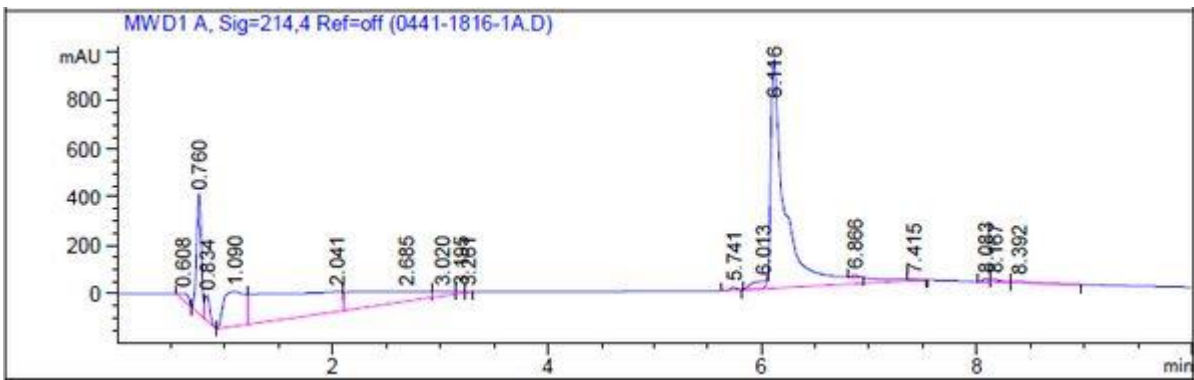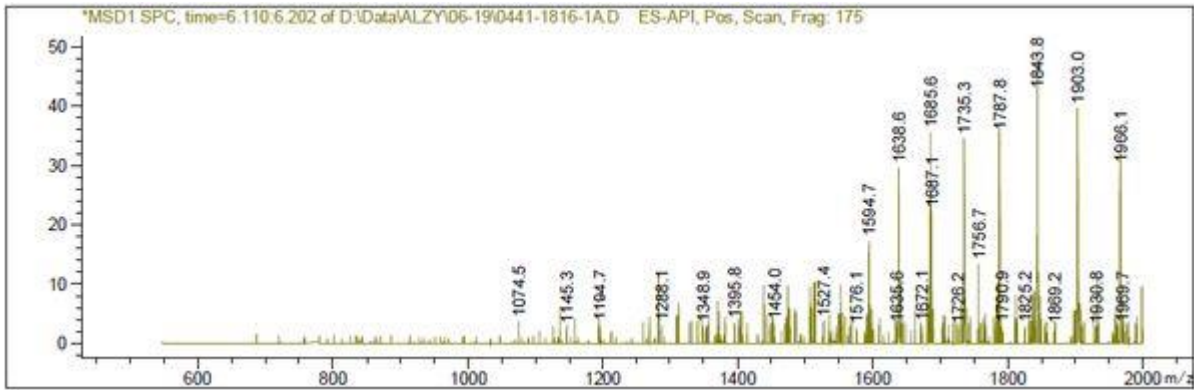

Exp 58964, obs 58962

Fc/FA-Ins6

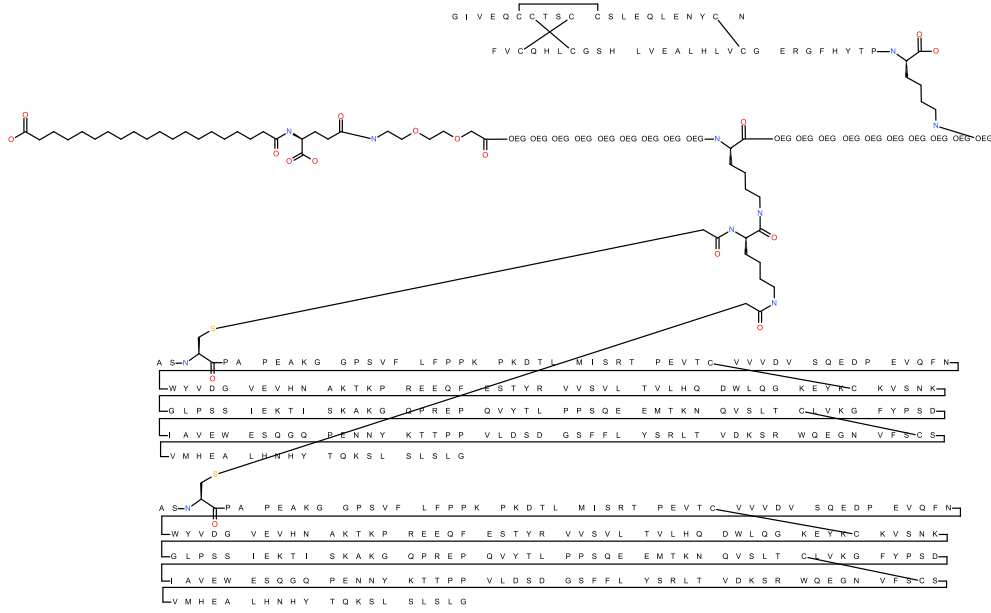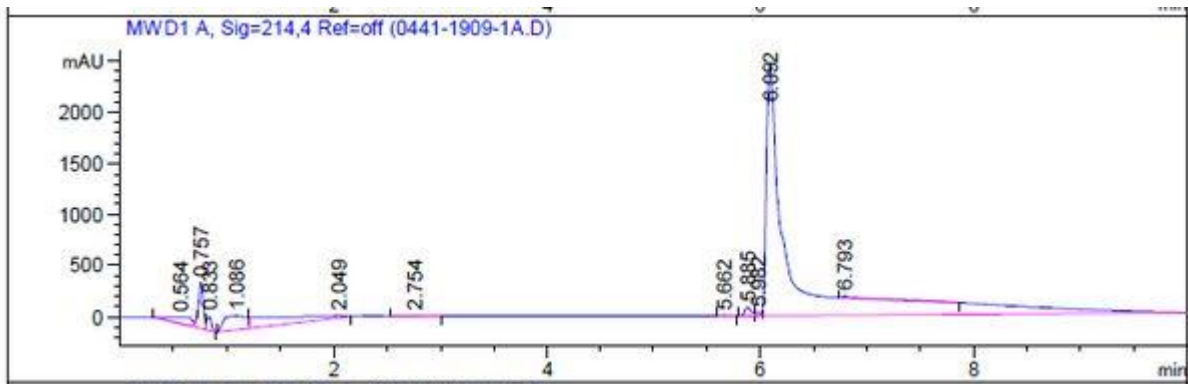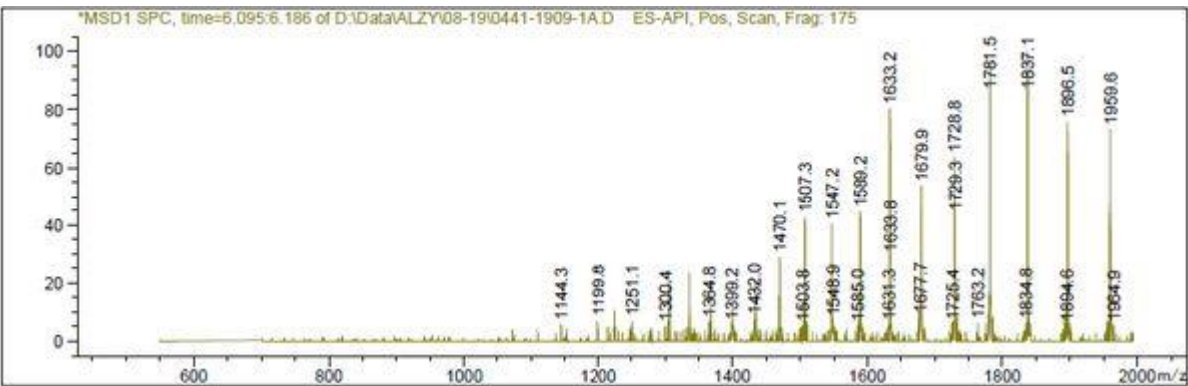

MW exp 58758, obs 58760

Fc/FA-Ins7

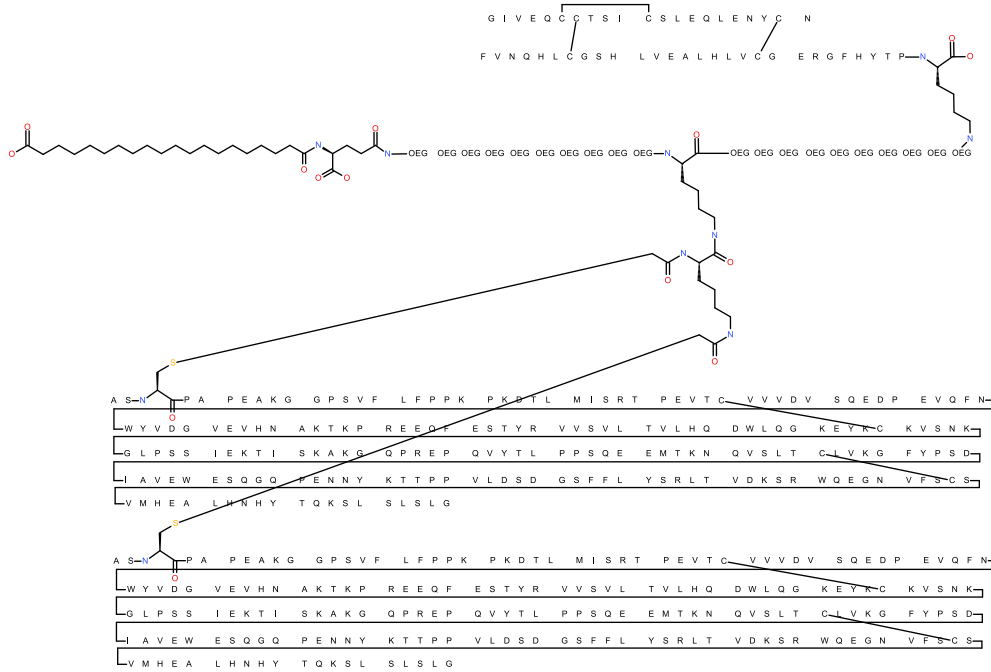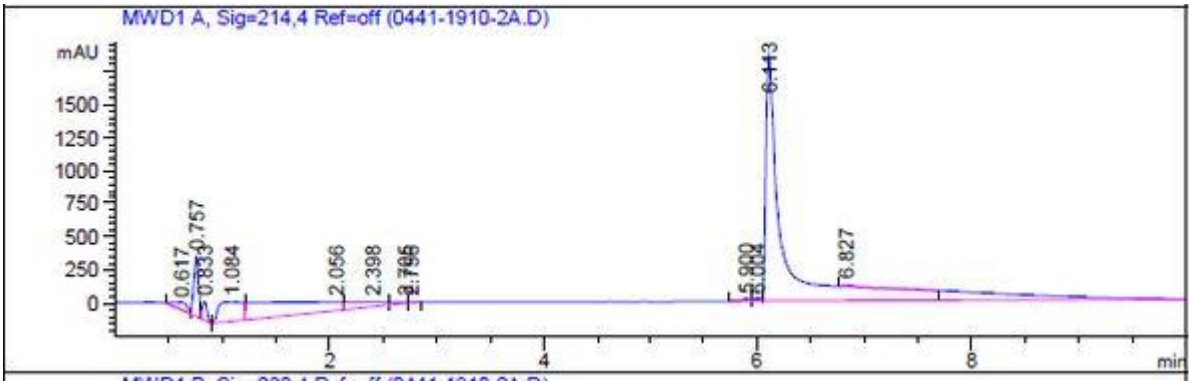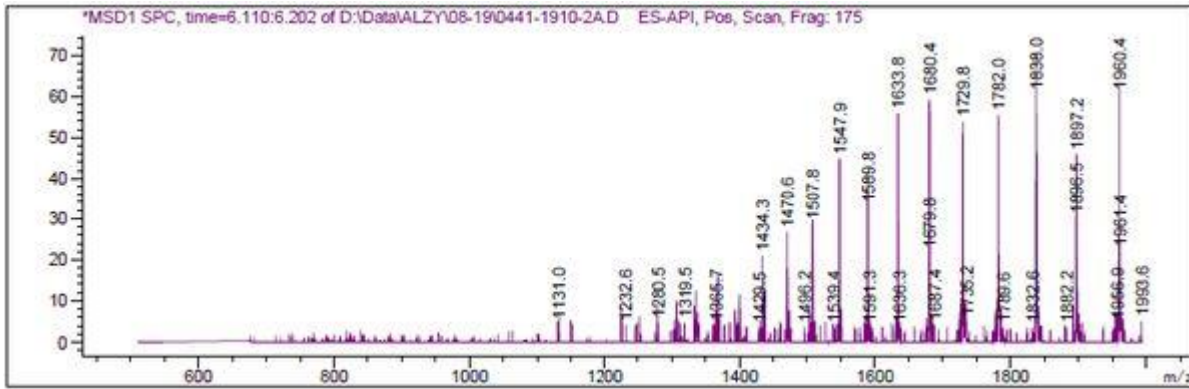

MW exp 58782, obs 58782

Fc/FA-Ins8

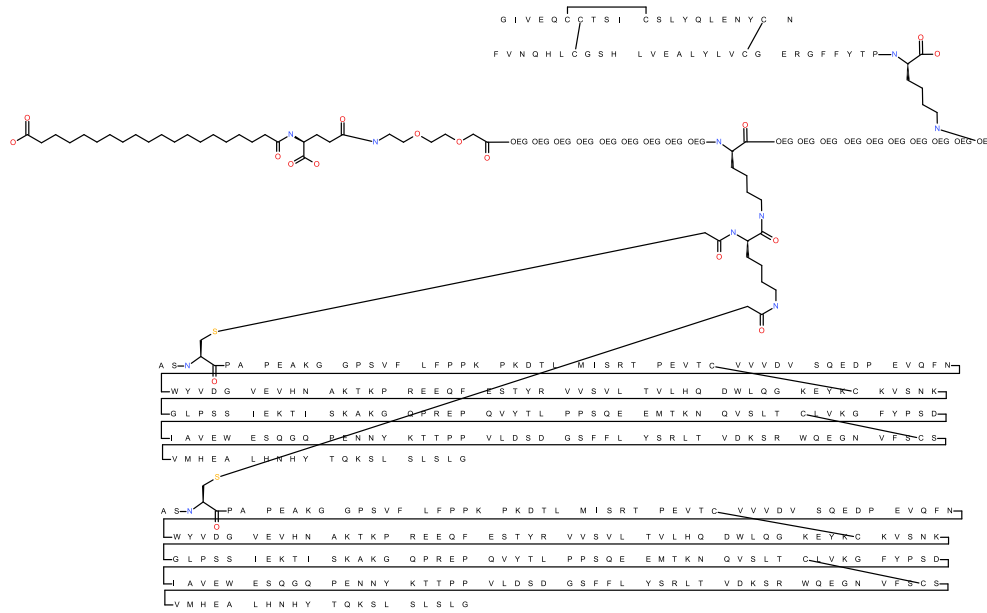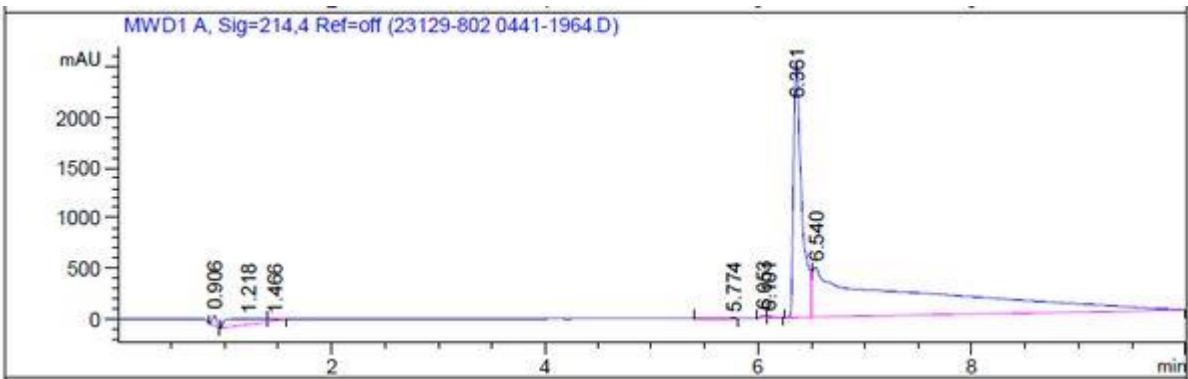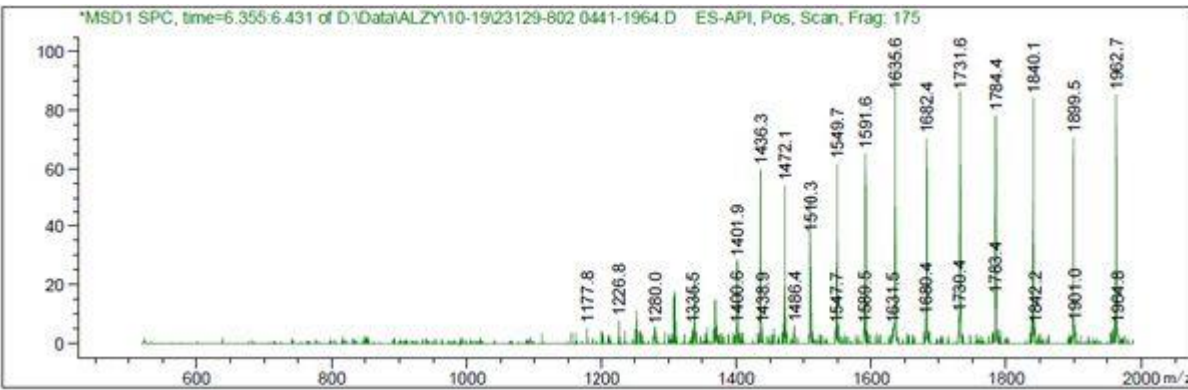

MW exp 58851, MW obs 58851



(Fc/FA)inv-Ins1

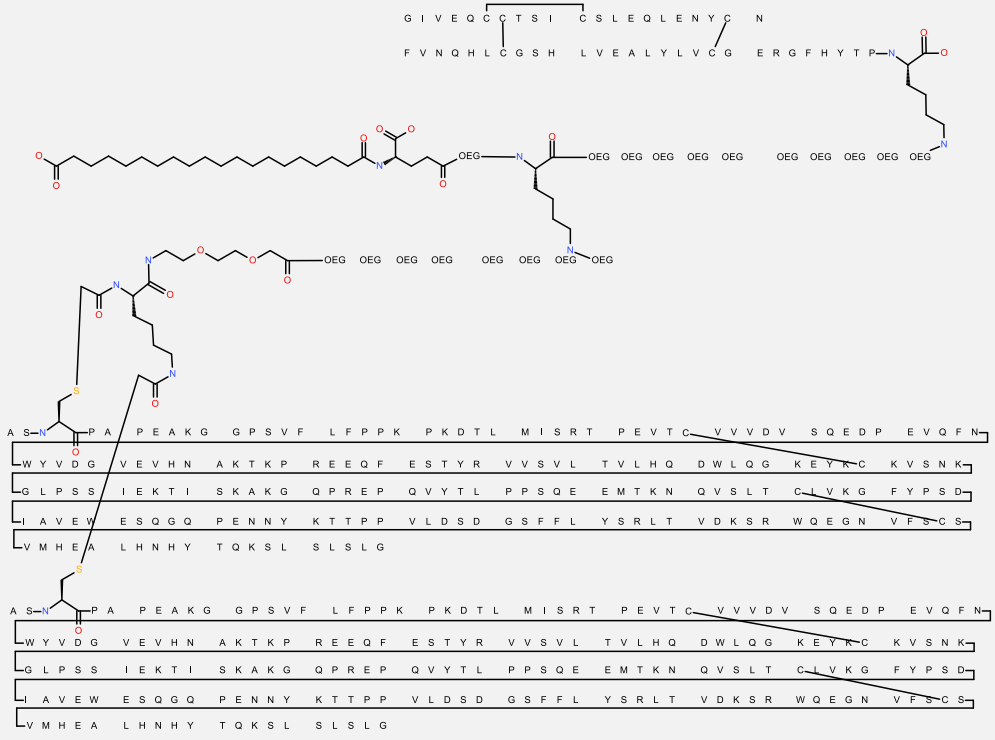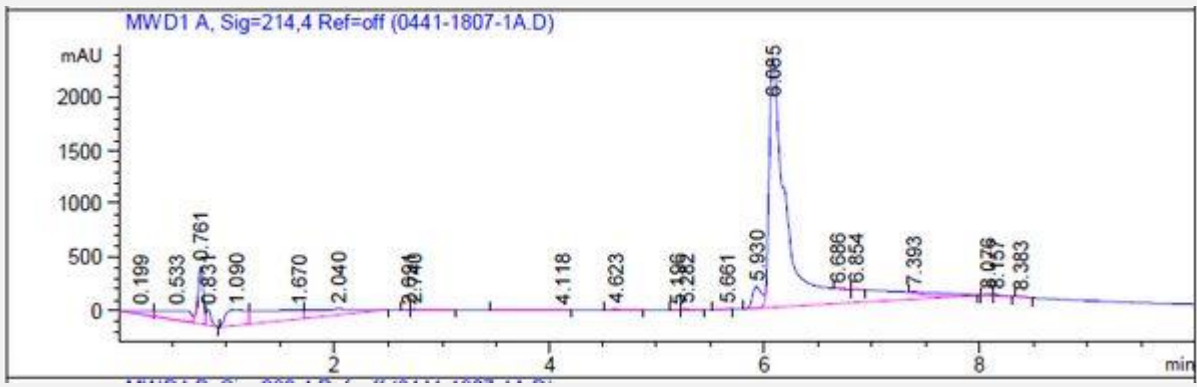

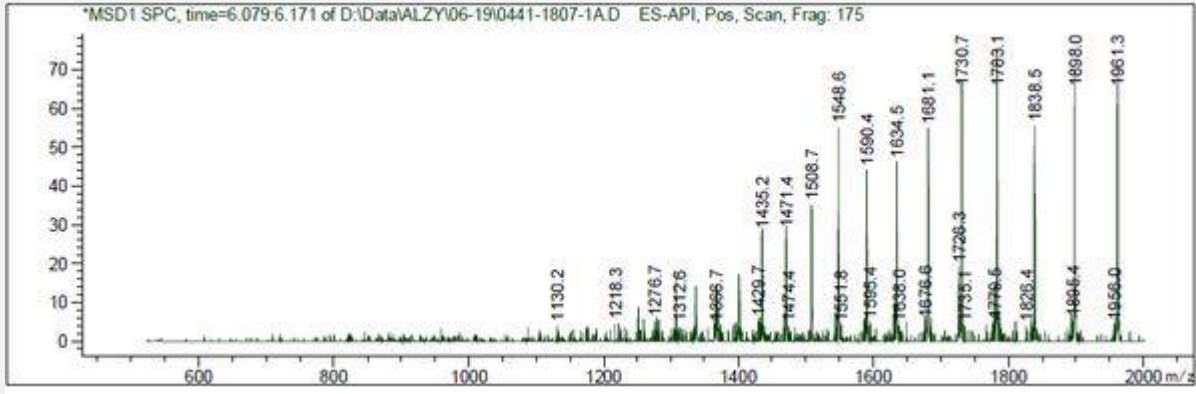

MW exp 58807, obs 58809

(Fc/FA)v1-Ins1

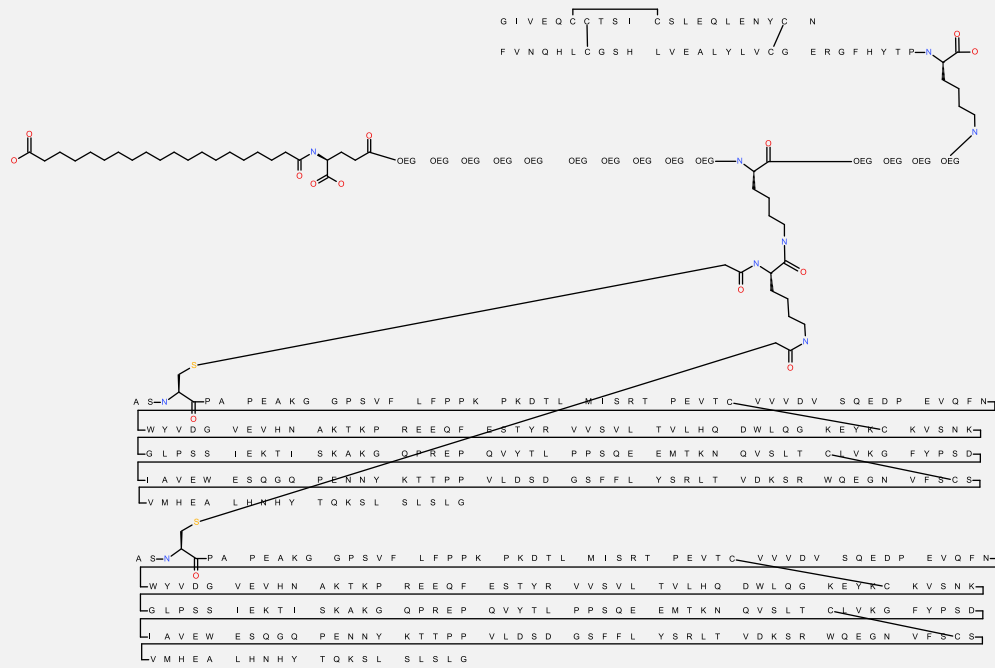

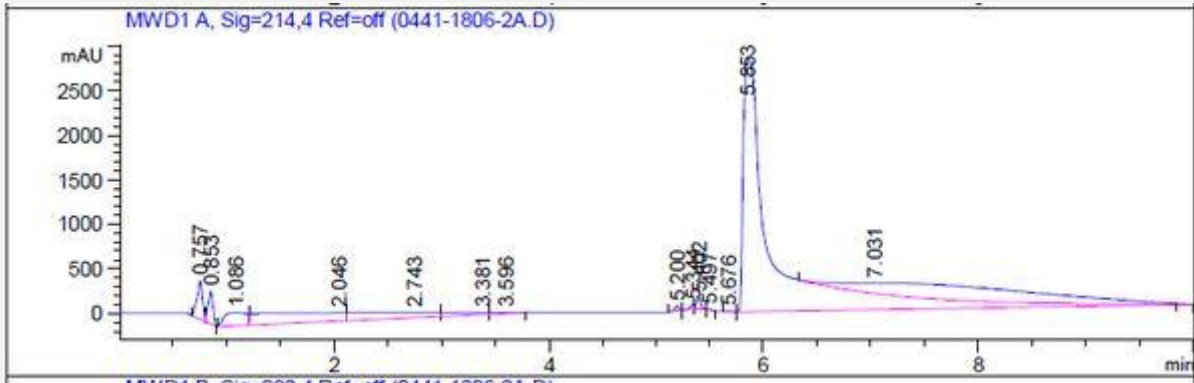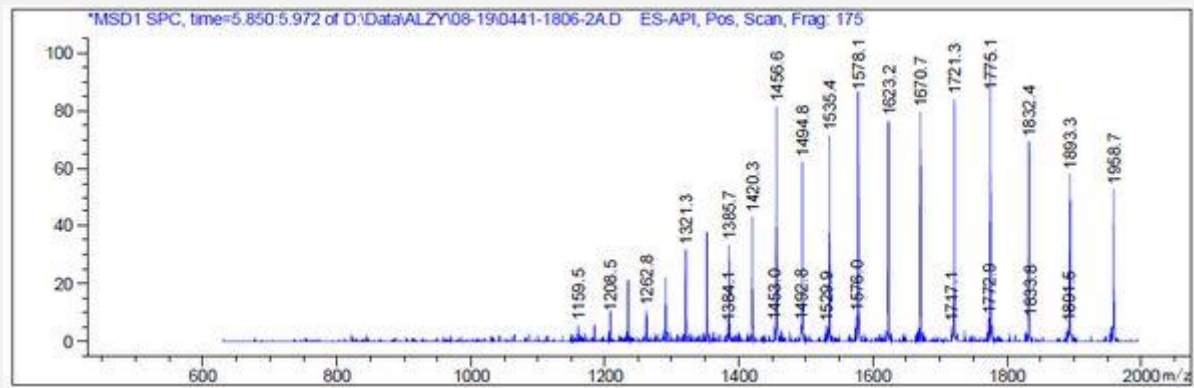

MW exp 57936, obs 57933

(Fc/FA)v2-Ins1

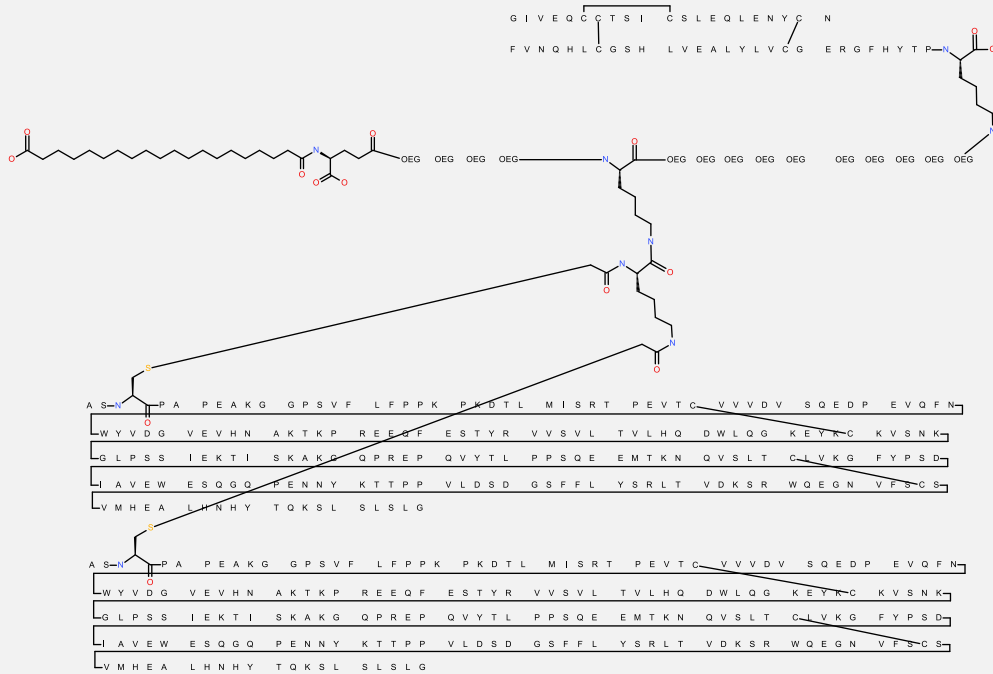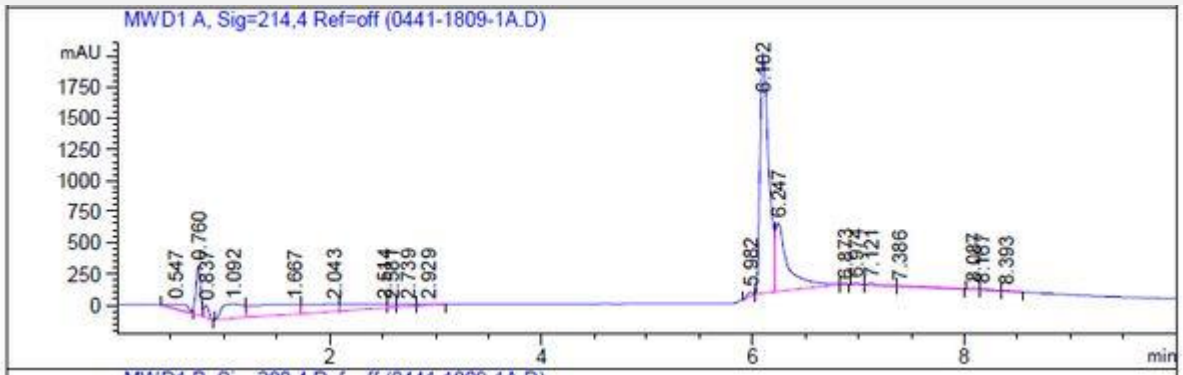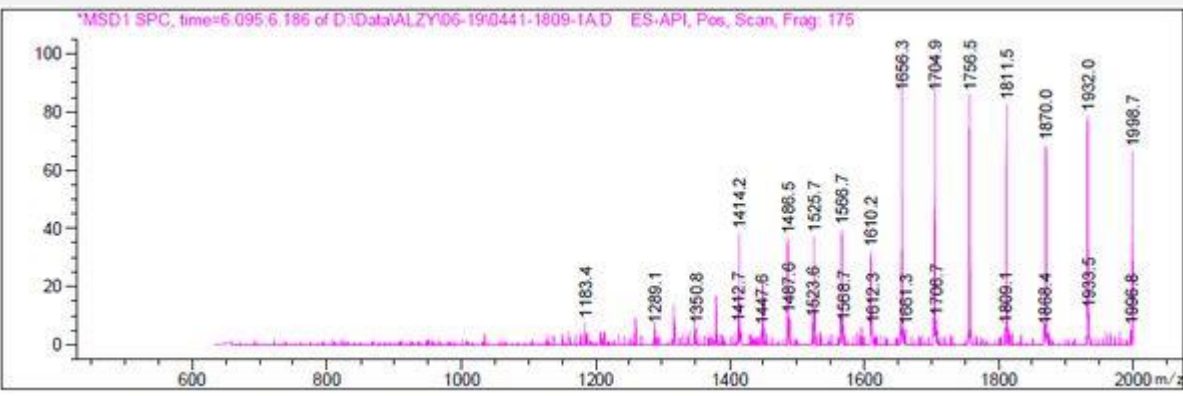

MW 57936, obs 57939

(Fc/FA)v3-Ins1

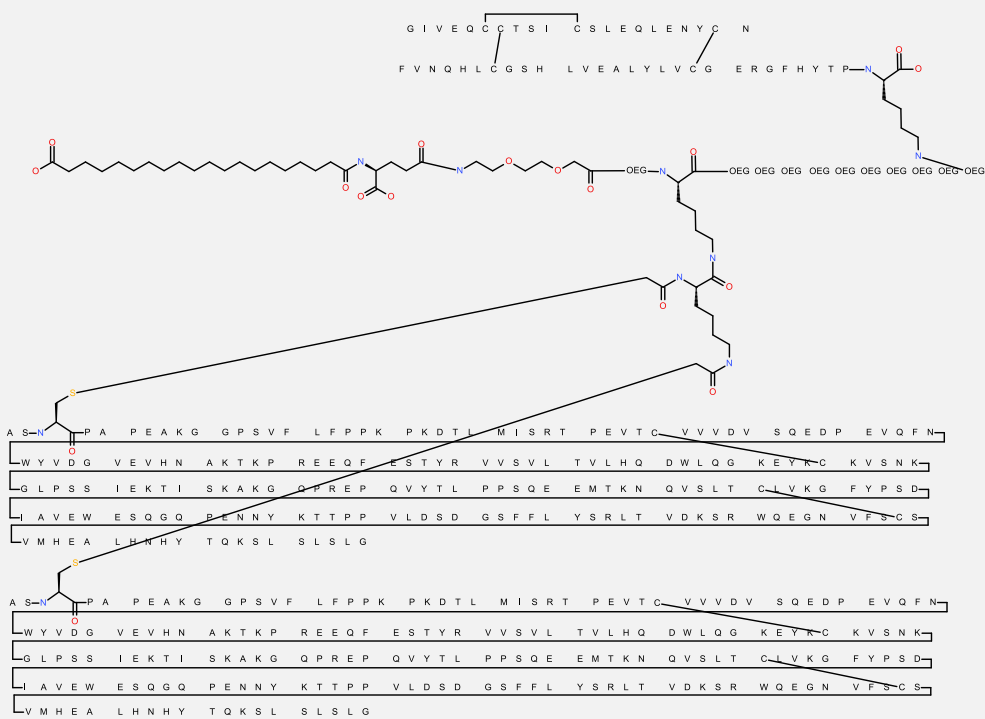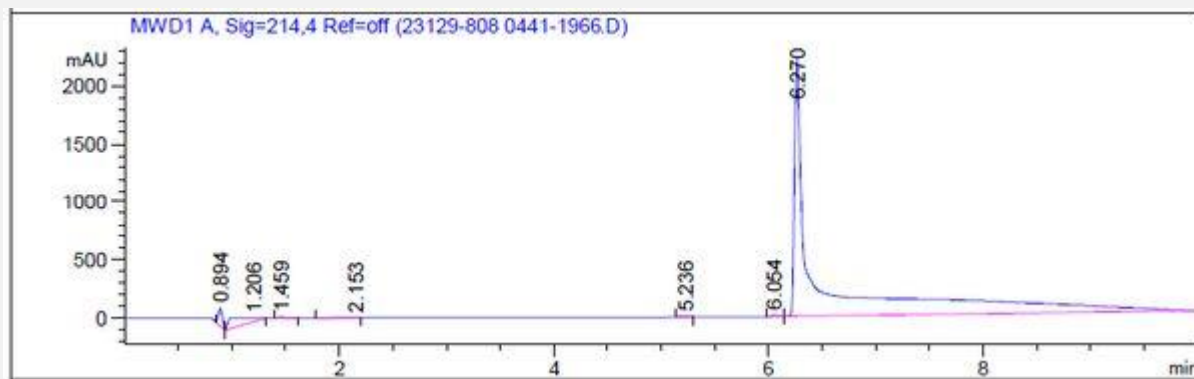

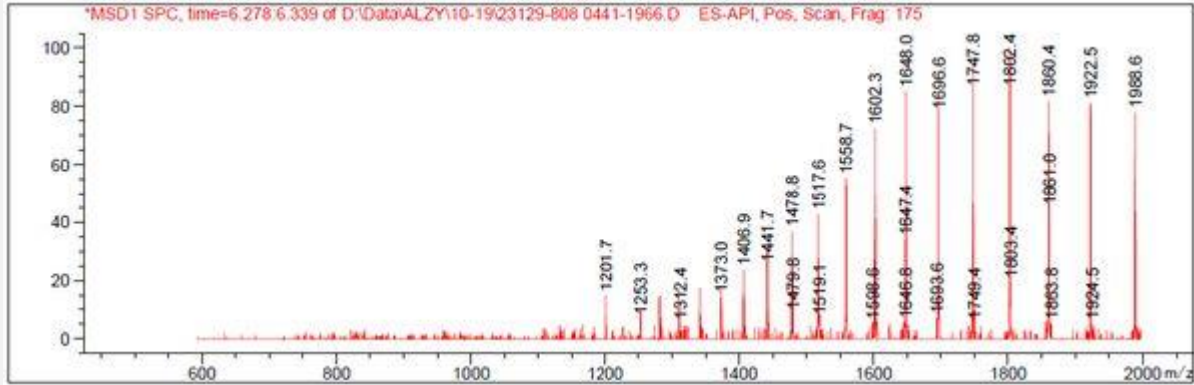

MW exp 57645, obs 57645

(Fc/FA)half-Ins1

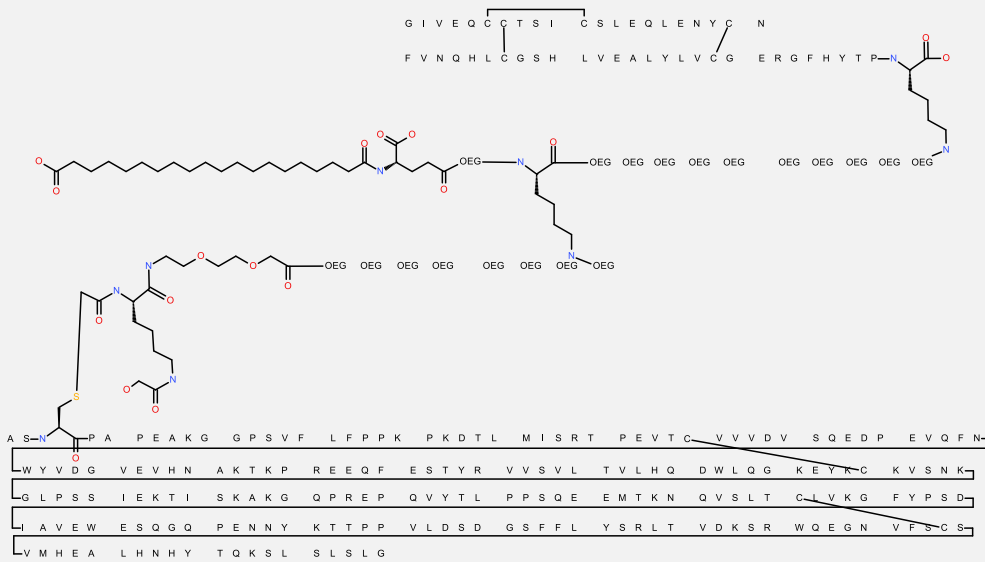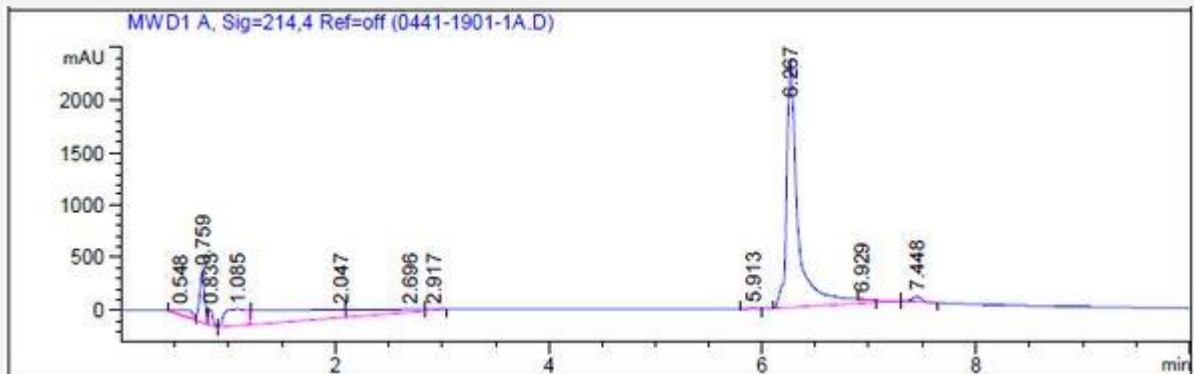

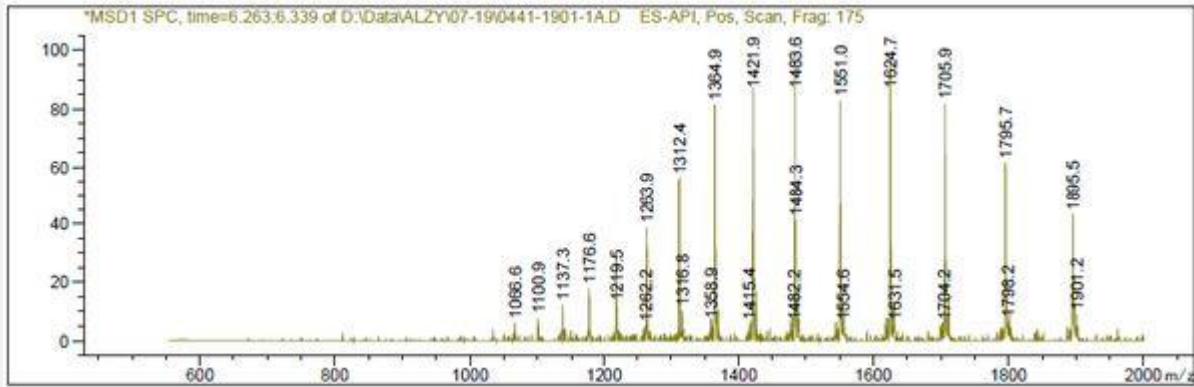

MW 34099, obs 34101

Fc/FA-Ins9

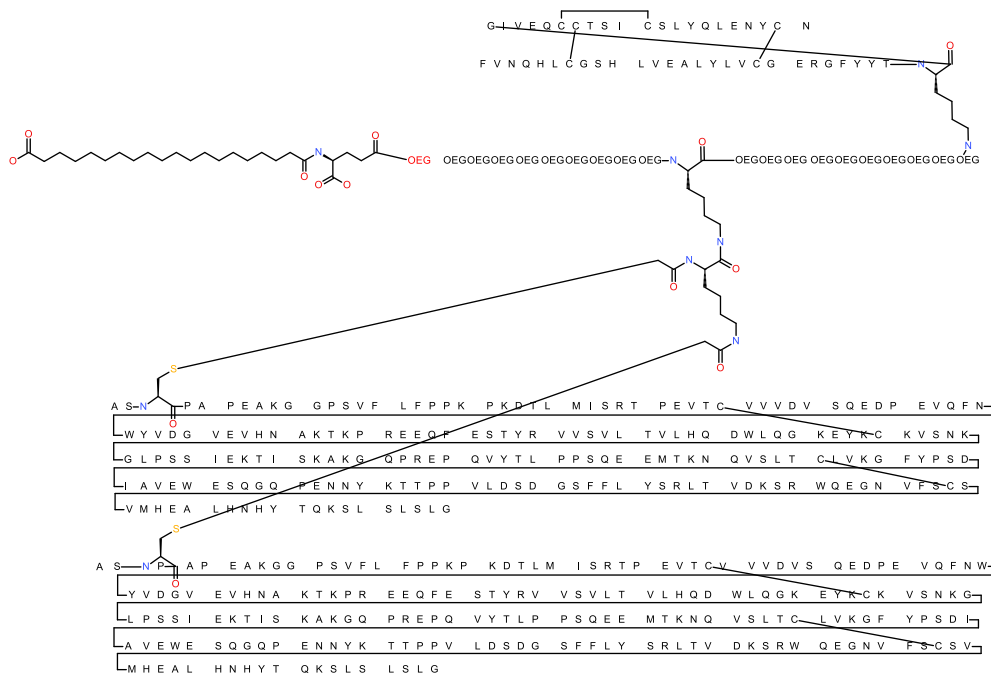

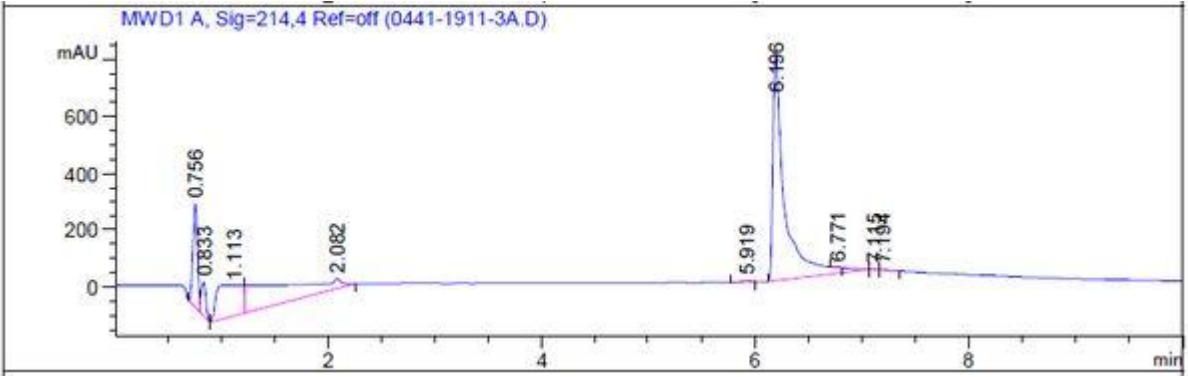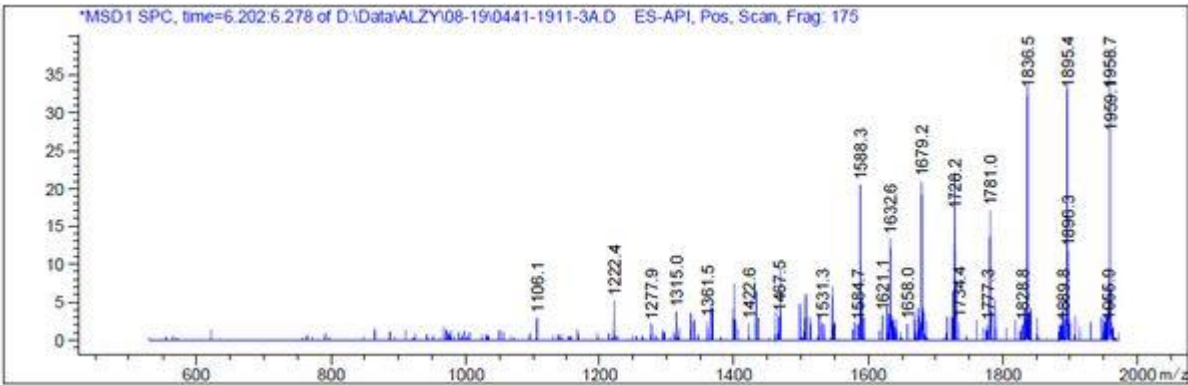

MW exp 58736, obs 58740

Fc-Ins9

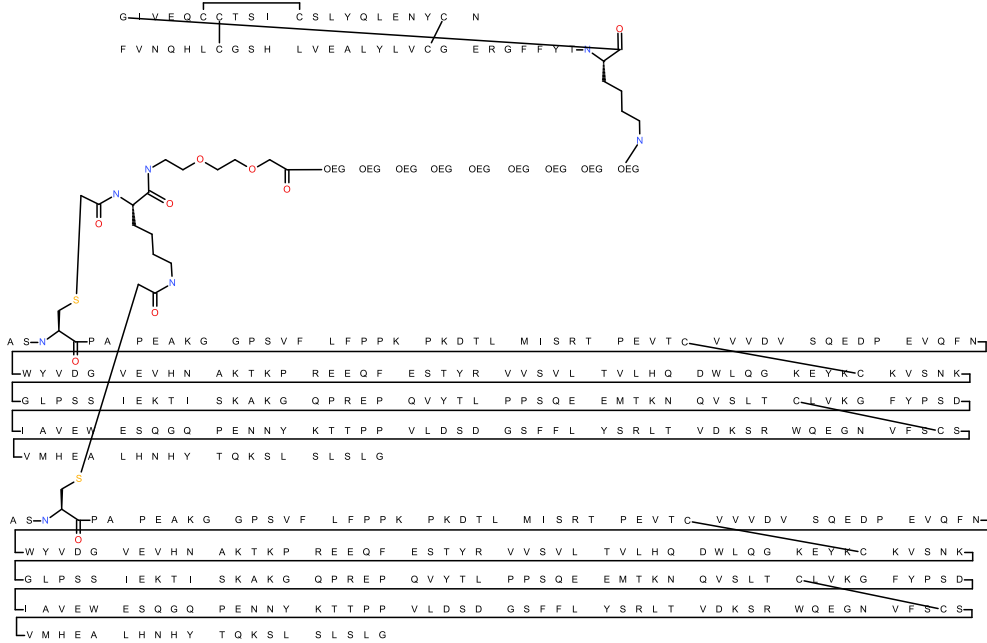



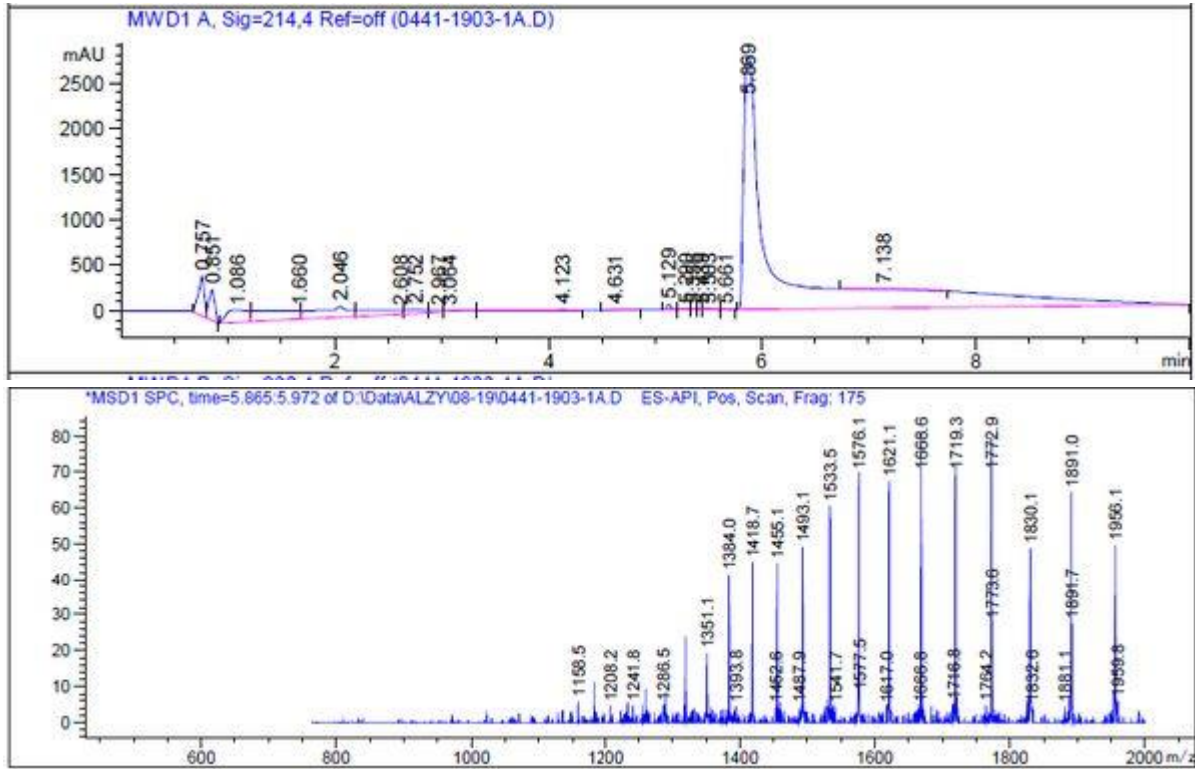

MW exp 56701, obs 56700
